# Supplementary material for: Analysis of the NK2 homeobox gene ceh-24 reveals sublateral motor neuron control of left-right turning during sleep
Source: eLife journal article supplement (doi:10.7554/elife.24846), 2017-02-28

A

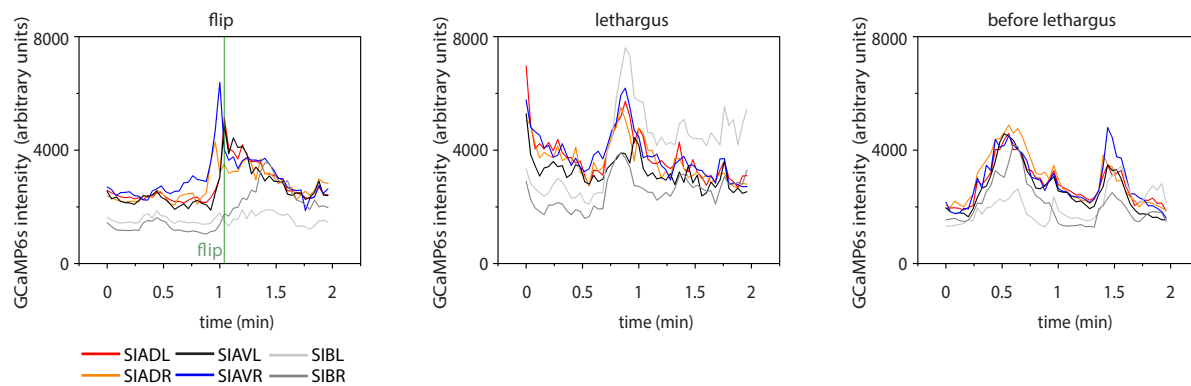

B

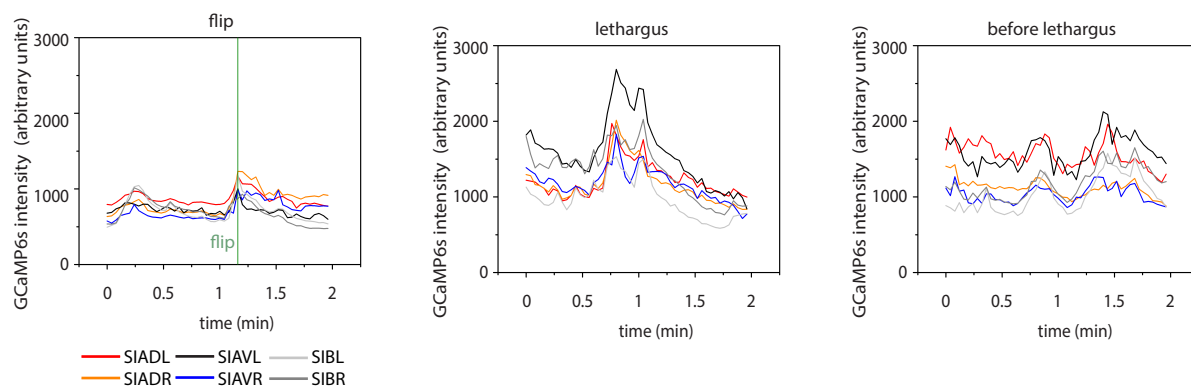

C

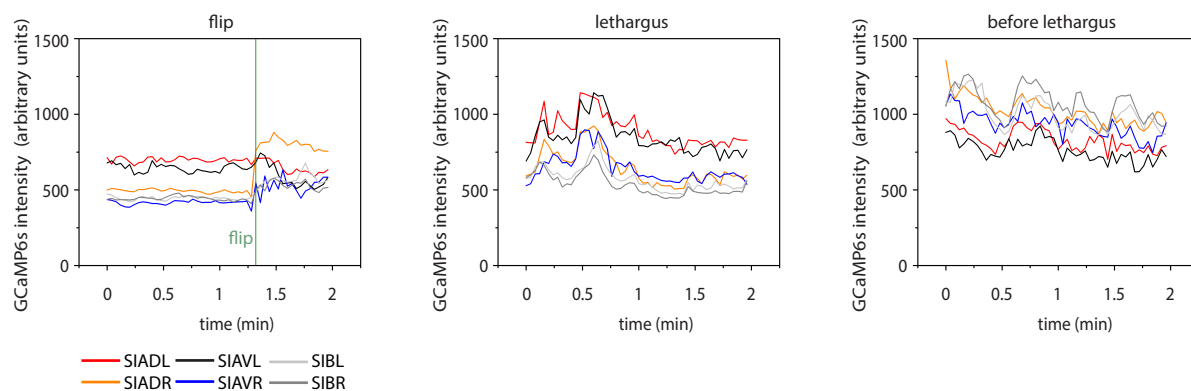

D

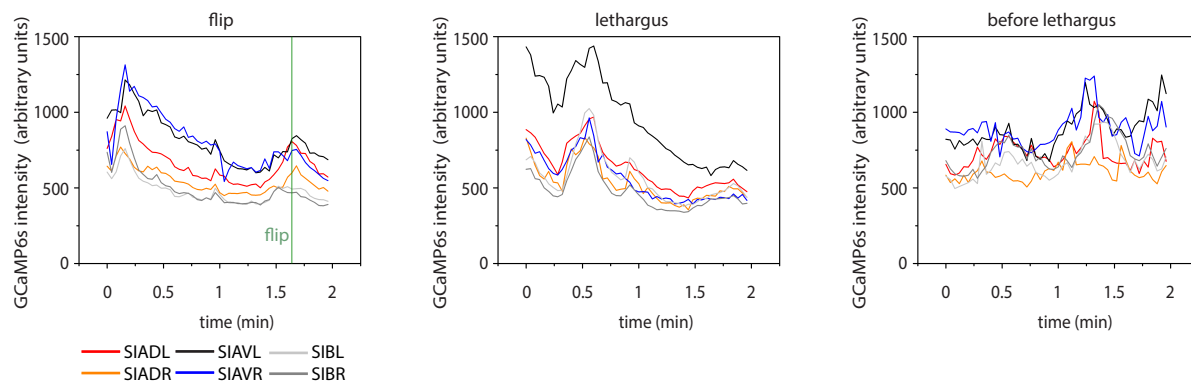

# Supplement 6, Schwarz and Bringmann

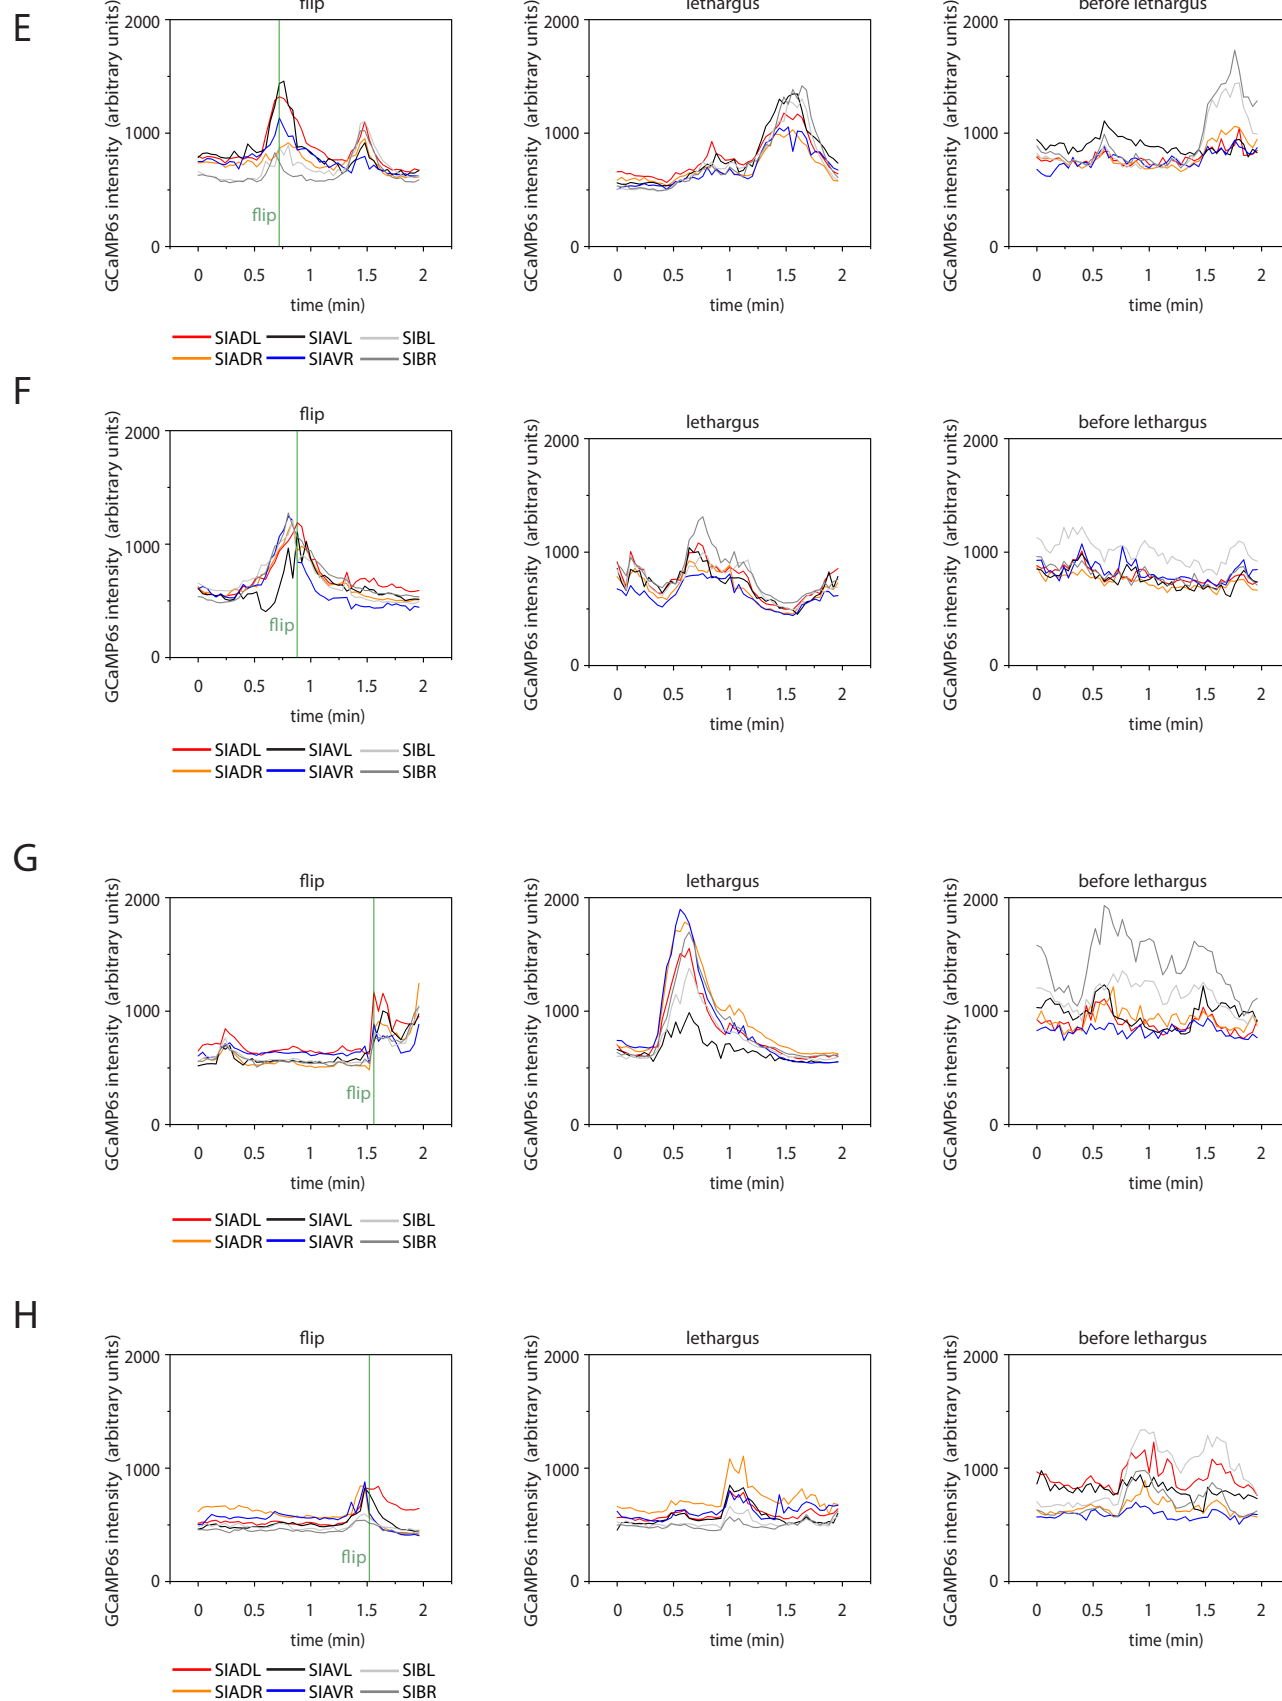

Supplement: supp [file elife-24846-supp-v1.zip]
