# Supplementary figures and images for: Analysis of the NK2 homeobox gene ceh-24 reveals sublateral motor neuron control of left-right turning during sleep
Source: eLife journal article supplement (doi:10.7554/elife.24846), 2017-02-28

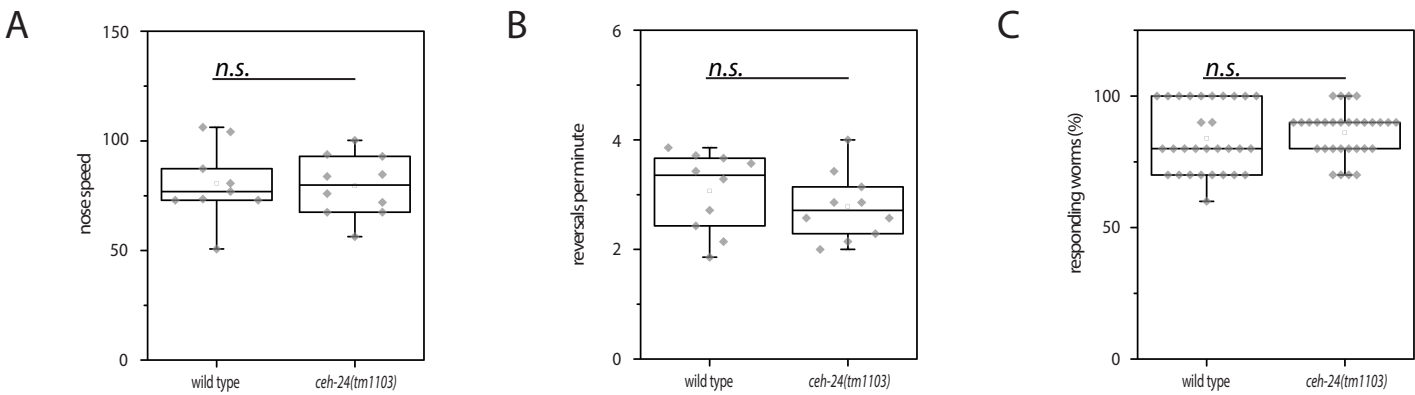

Supplement: supp [file elife-24846-supp-v1.zip]

A

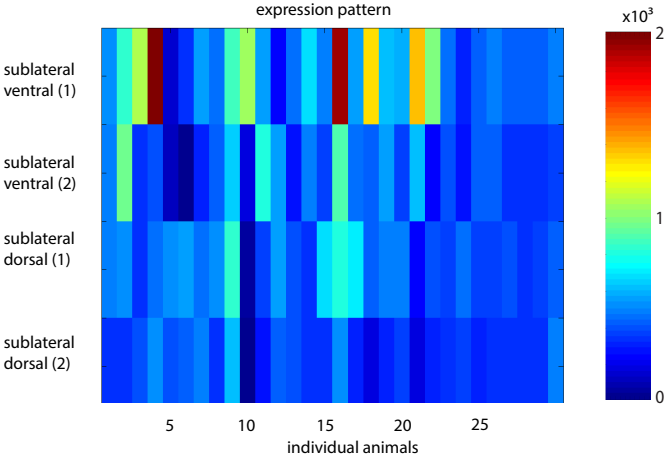

Supplement: supp [file elife-24846-supp-v1.zip]

## Supplement 1, Schwarz and Bringmann

A

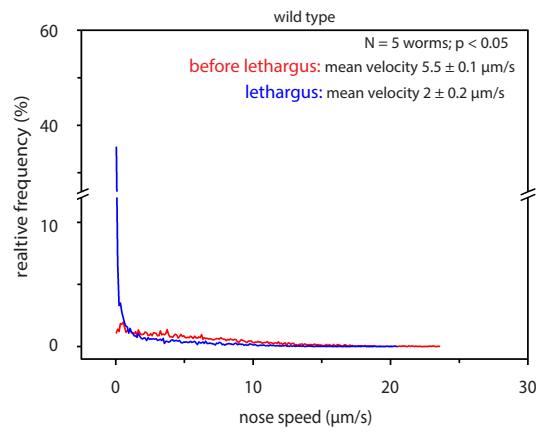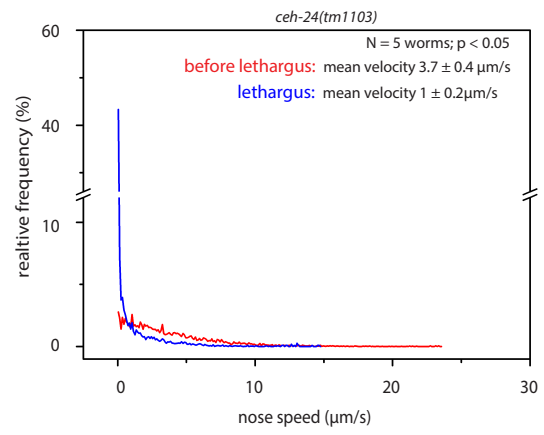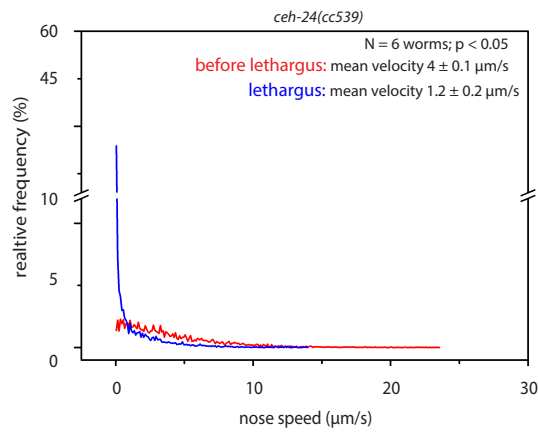

Supplement: supp [file elife-24846-supp-v1.zip]

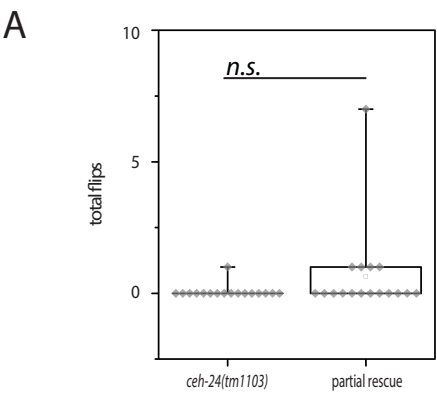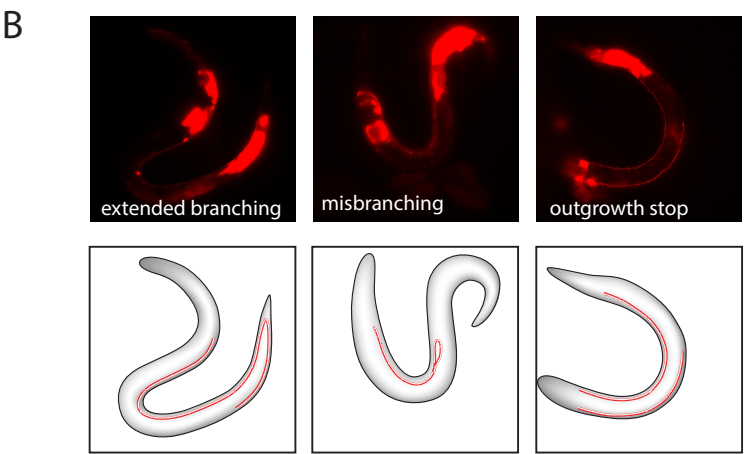

Supplement: supp [file elife-24846-supp-v1.zip]

# Supplement 5, Schwarz and Bringmann

A

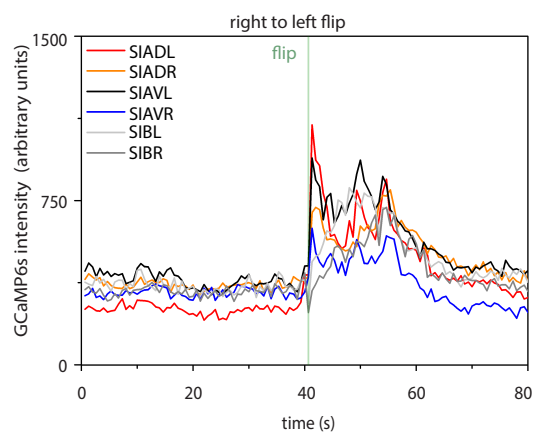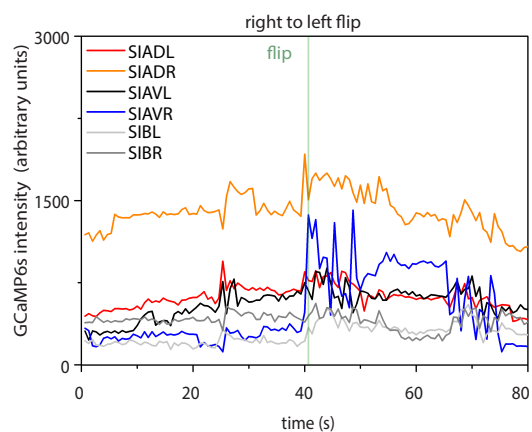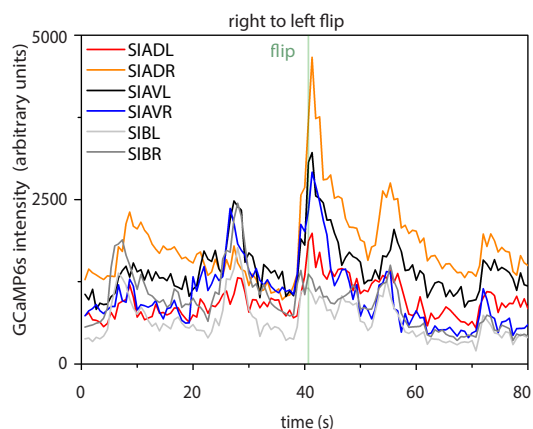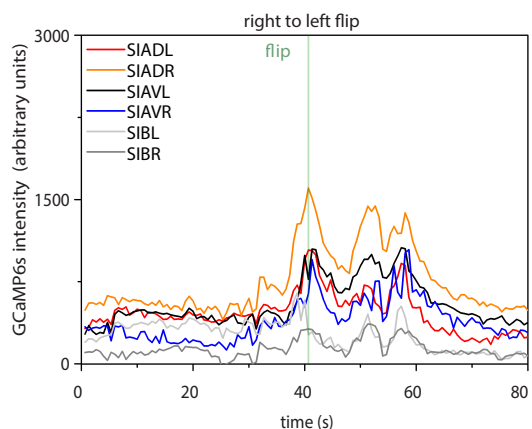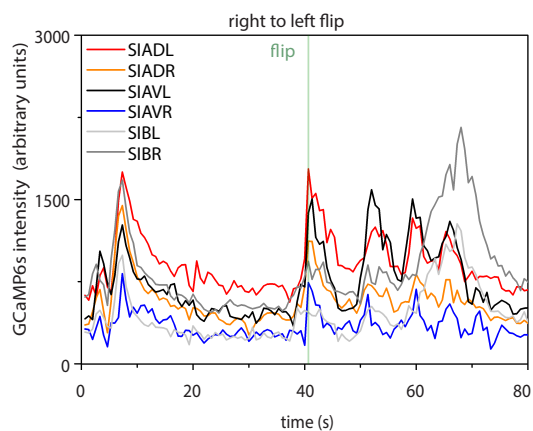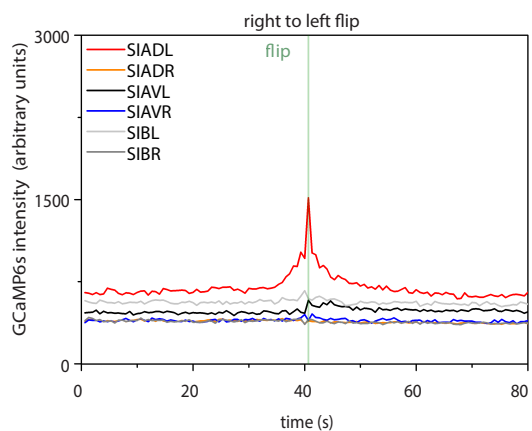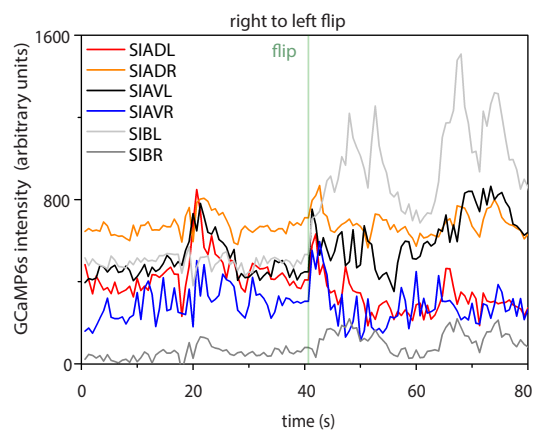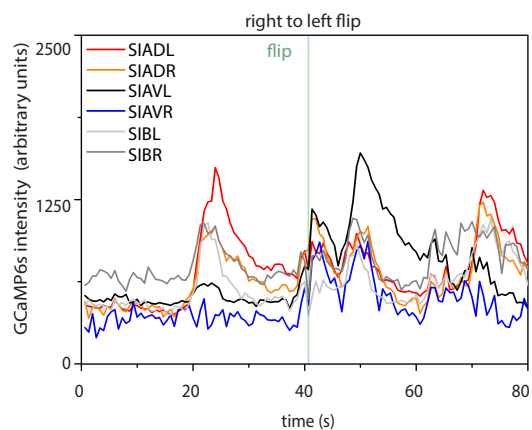

Supplement: supp [file elife-24846-supp-v1.zip]

A

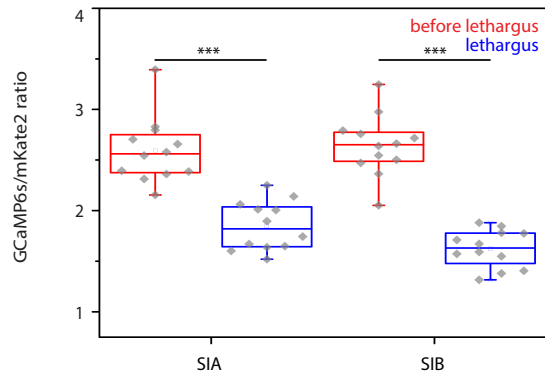

B

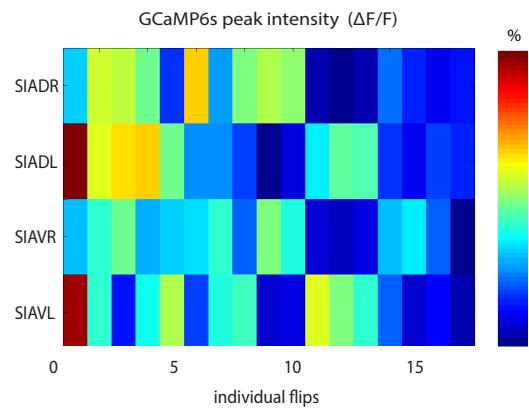

C

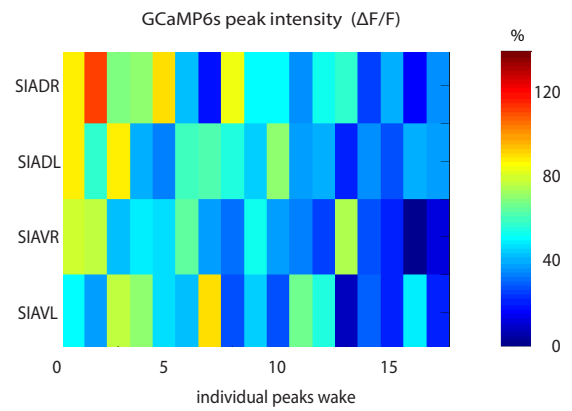

Supplement: supp [file elife-24846-supp-v1.zip]

# Supplement 4, Schwarz and Bringmann

A

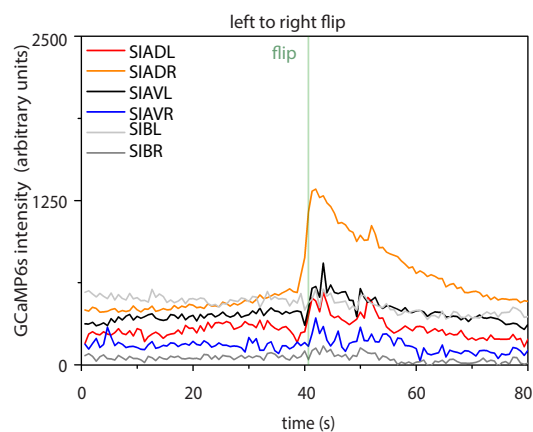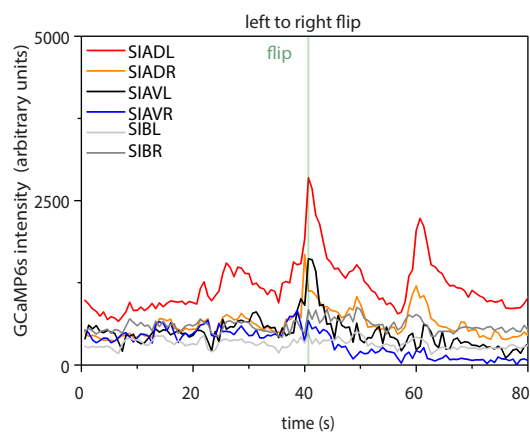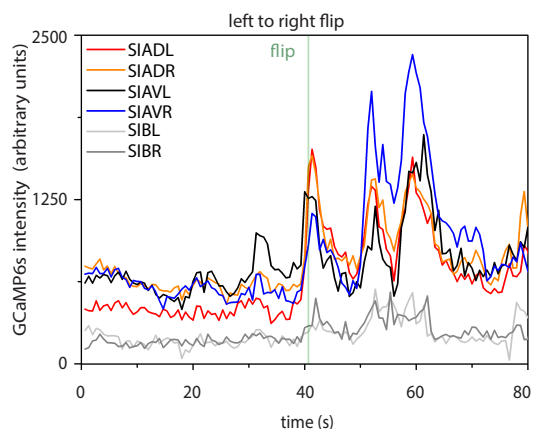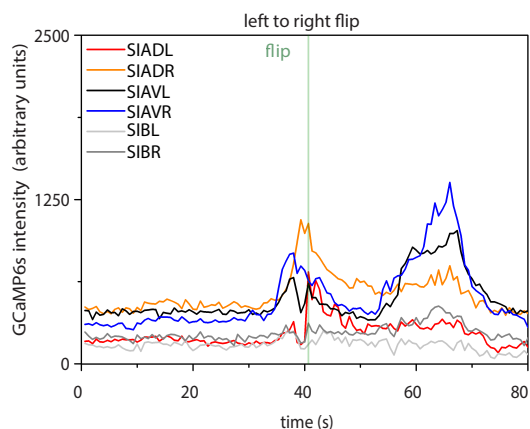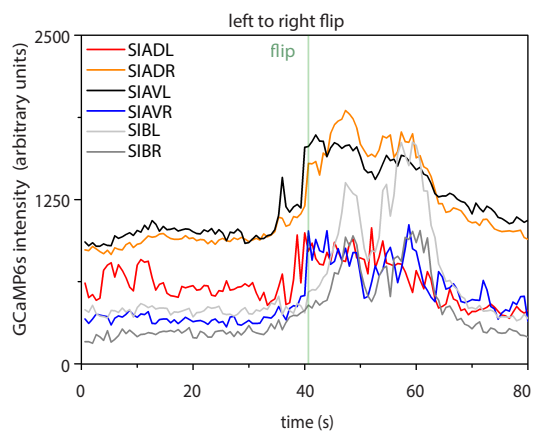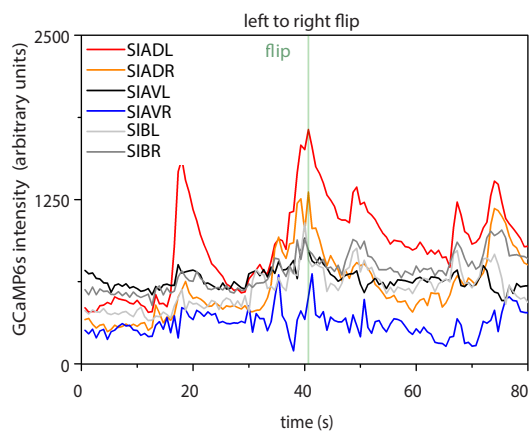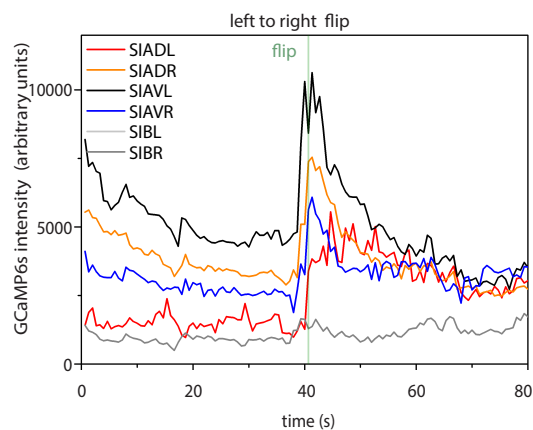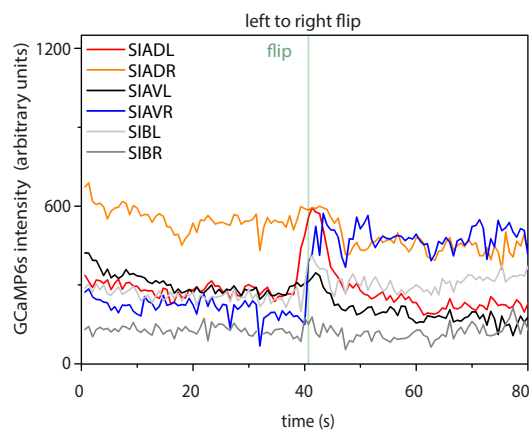

Supplement: supp [file elife-24846-supp-v1.zip]
